# Supplementary material
Source: publisher site journal article supplement (https://www.spandidos-publications.com/2701/downloadSupplementary)
Supplement: Supplementary file 1 [file downloadSupplementary]

## Sheet: Supplementary table 1 
Table SI. Pathway enrichment of the differntially expressed genes by Gene Set Enrichment Analysis.
NAME	ES	NES	NOM P-value
GO_TISSUE_DEVELOPMENT	0.411988	2.18234	0
GO_POSITIVE_REGULATION_OF_BIOSYNTHETIC_PROCESS	0.385608	1.86382	0.00479616
GO_REGULATION_OF_CELL_DEATH	0.367086	1.75954	0.00606796
GO_ORGAN_MORPHOGENESIS	0.402488	1.69739	0.0101523
GO_POSITIVE_REGULATION_OF_TRANSCRIPTION_FROM_RNA_POLYMERASE_II_PROMOTER	0.387473	1.73463	0.0109756
GO_NEURON_DEVELOPMENT	0.468932	1.8154	0.0118421
GO_RESPONSE_TO_LIPID	0.402599	1.73695	0.0126582
GO_CELL_DEVELOPMENT	0.37647	1.7667	0.0154394
GO_REGULATION_OF_ANATOMICAL_STRUCTURE_MORPHOGENESIS	0.40525	1.72694	0.0164975
GO_POSITIVE_REGULATION_OF_CELLULAR_COMPONENT_ORGANIZATION	0.4368	1.65307	0.0186418
GO_RESPONSE_TO_ORGANIC_CYCLIC_COMPOUND	0.395516	1.74688	0.0189633
GO_ORGANIC_ACID_METABOLIC_PROCESS	0.47148	1.68548	0.0222531
GO_ORGANONITROGEN_COMPOUND_METABOLIC_PROCESS	0.381507	1.63313	0.0225464
GO_CELLULAR_RESPONSE_TO_OXYGEN_CONTAINING_COMPOUND	0.405308	1.63126	0.0226969
GO_POSITIVE_REGULATION_OF_GENE_EXPRESSION	0.330996	1.63077	0.0259434
GO_SMALL_MOLECULE_METABOLIC_PROCESS	0.38235	1.64529	0.0266497
GO_RESPONSE_TO_EXTRACELLULAR_STIMULUS	0.438014	1.65501	0.0268097
GO_RESPONSE_TO_WOUNDING	0.451371	1.63764	0.0271003
GO_TISSUE_MORPHOGENESIS	0.38642	1.64266	0.0310559
GO_REPRODUCTION	0.401589	1.6262	0.0314961
GO_RESPONSE_TO_OXYGEN_CONTAINING_COMPOUND	0.338533	1.58506	0.0319803
GO_REGULATION_OF_TRANSCRIPTION_FROM_RNA_POLYMERASE_II_PROMOTER	0.326301	1.55457	0.0348977
GO_PROTEINACEOUS_EXTRACELLULAR_MATRIX	0.443554	1.61718	0.0396825
GO_NEURON_DIFFERENTIATION	0.387749	1.58561	0.0412903
GO_POSITIVE_REGULATION_OF_CELL_DEATH	0.404279	1.59887	0.0421053
GO_NEGATIVE_REGULATION_OF_CELL_DEATH	0.395632	1.58422	0.0421456
GO_REGULATION_OF_CELL_ADHESION	0.400597	1.57122	0.042953
GO_EPITHELIUM_DEVELOPMENT	0.354796	1.57411	0.0469543
GO_POSITIVE_REGULATION_OF_MULTICELLULAR_ORGANISMAL_PROCESS	0.323577	1.53067	0.0484848
GO_CALCIUM_ION_BINDING	0.377808	1.53705	0.048718
ES: estimate socre; NES: normalized enrichment score; NOM P-value: norminal P-value
